# Supplementary material for: Incidence and Risk Factors for Severe Outcomes in Pediatric Patients With COVID-19
Source: Oxford University Press journal article supplement (doi:10.1542/hpeds.2022-006833), 2023-04-11
Supplement: hpeds.2022-006833supplementarydata.pdf [file hpeds.2022-006833supplementarydata.pdf]

## Supplemental Information

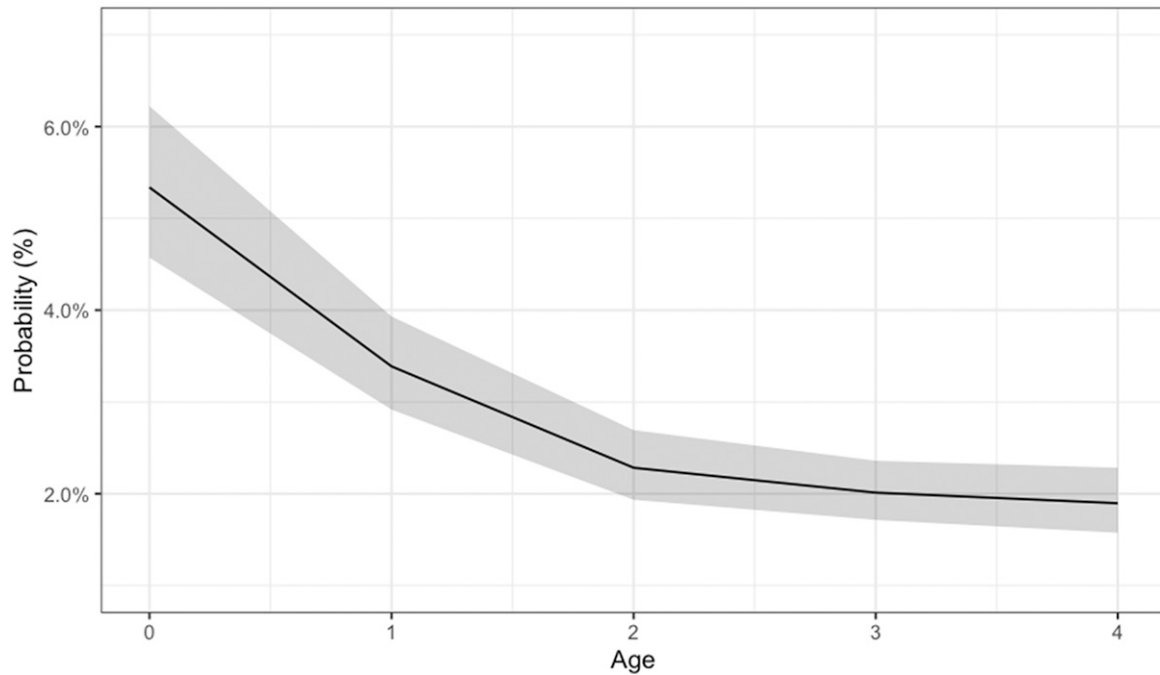

**SUPPLEMENTAL FIGURE 5** Partial-effects plot displaying probability of severe outcomes by age for 0- to 4-year-old patients. Variables held constant: PCI score: 1 (representing absence of pretest comorbidities), race/ethnicity: Caucasian, sex: male, insurance type: commercial, region: Midwest, variant: original. Black line represents mean effect, gray area represents 95% confidence interval.

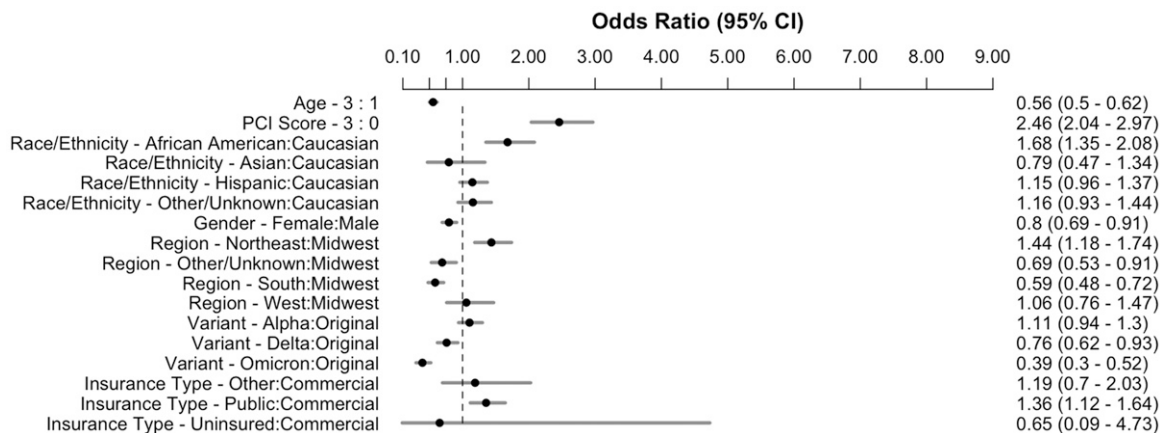

**SUPPLEMENTAL FIGURE 6** Odds ratios with 95% confidence intervals from multivariable ordinal regression model between risk factors and severe outcomes with a primary diagnosis of COVID-10 in 0- to 4-year-old patients. For continuous variables represented by restricted cubic splines (age and PCI score), we present adjusted odds ratios comparing the 75th to 25th percentiles.

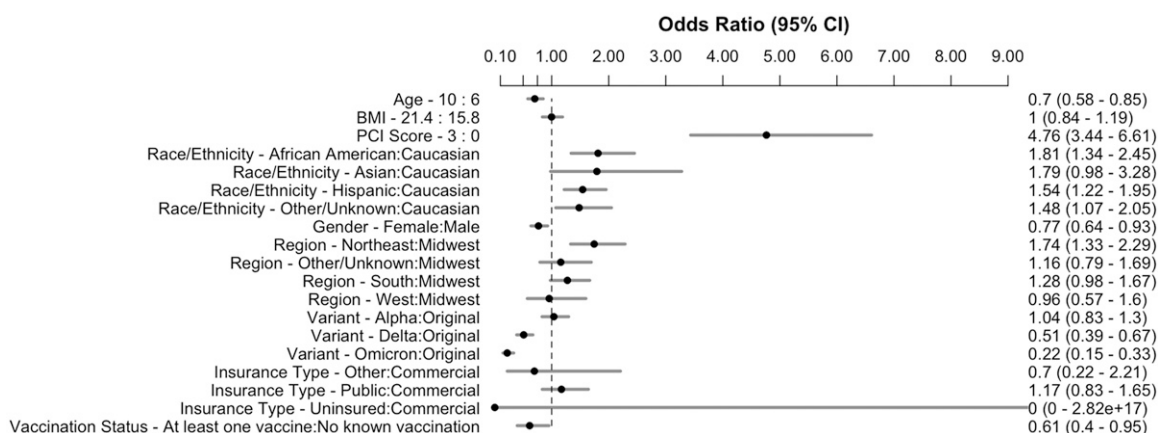

**SUPPLEMENTAL FIGURE 7** Odds ratios with 95% confidence intervals from multivariable ordinal regression model between risk factors and severe outcomes with a primary diagnosis of COVID-19 in 5- to 11-year-old patients. For continuous variables represented by restricted cubic splines (age, BMI [kg/m<sup>2</sup>], and PCI score), we present adjusted odds ratios comparing the 75th to 25th percentiles.

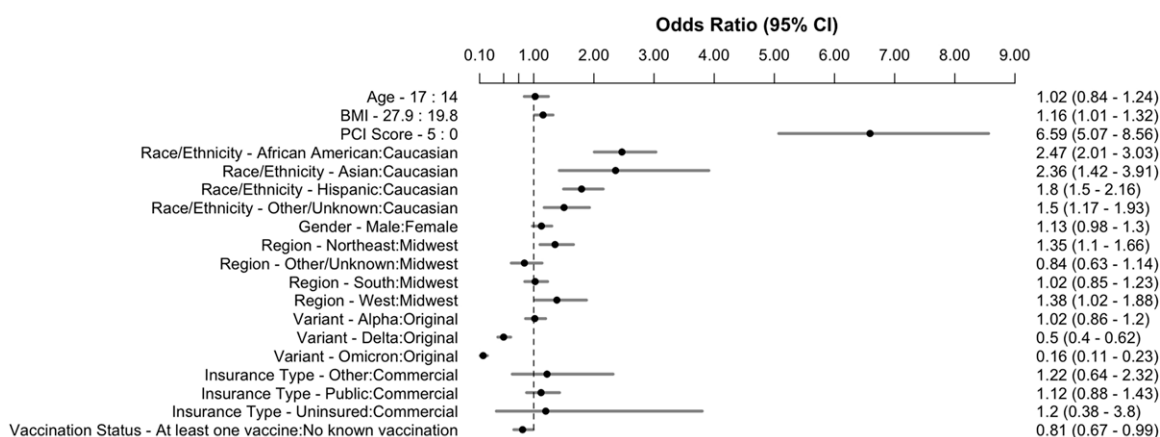

**SUPPLEMENTAL FIGURE 8** Odds ratios with 95% confidence intervals from multivariable ordinal regression model between risk factors and severe outcomes with a primary diagnosis of COVID-19 in 12- to 18-year-old patients. For continuous variables represented by restricted cubic splines (age, BMI [kg/m<sup>2</sup>], and PCI score), we present adjusted odds ratios comparing the 75th to 25th percentiles.

**SUPPLEMENTAL TABLE 2** Likelihood Ratio Test to Assess Goodness of Fit for Each Age Group Model

| Model        | LR $\chi^2$ | df | P     | C     |
|--------------|-------------|----|-------|-------|
| 0-4 y olds   | 3167        | 19 | <.001 | 0.808 |
| 5-11 y olds  | 3263        | 22 | <.001 | 0.879 |
| 12-18 y olds | 6088        | 24 | <.001 | 0.877 |

C, concordance index, a measure of goodness of fit for outcomes in a logistic regression model; df, degrees of freedom based on the number of variables included in the model; LR  $\chi^2$ , likelihood ratio  $\chi^2$  statistic.

**SUPPLEMENTAL TABLE 3** Comparison of Models That Include an Interaction Term for Region and Race/Ethnicity or Region and Insurance Category, for Each Age Group

| Age Group    | Model                                        | Delta LR $\chi^2$ | df | <i>P</i> |
|--------------|----------------------------------------------|-------------------|----|----------|
| 0-4 y olds   | Linear Region:Race/Ethnicity Interaction     | 29.7              | 16 | <.001    |
|              | Linear Region:Insurance Category Interaction | 42.7              | 12 | <.001    |
| 5-11 y olds  | Linear Region:Race/Ethnicity Interaction     | 29.1              | 16 | <.001    |
|              | Linear Region:Insurance Category Interaction | 24.5              | 12 | <.001    |
| 12-18 y olds | Linear Region:Race/Ethnicity Interaction     | 74.0              | 16 | <.001    |
|              | Linear Region:Insurance Category Interaction | 46.6              | 12 | <.001    |

$\Delta$  LR  $\chi^2$ , change in likelihood ratio  $\chi^2$  statistic relative to the respective age group model absent interaction terms; df, degrees of freedom based on the number of variables included in the model.

**SUPPLEMENTAL TABLE 4** Demographics, Clinical Factors, and Outcomes for Children in a Sensitivity Analysis of This Cohort for Hospitalizations and Other Severe Outcomes With a Primary Diagnosis of COVID-19

|                                       | 0–4 Year Olds (N = 35 088) | 5–11 Year Olds (N = 75 574) | 12–18 Year Olds (N = 54 775) | Overall (N = 165 437) |
|---------------------------------------|----------------------------|-----------------------------|------------------------------|-----------------------|
| Race/ethnicity, n (%)                 |                            |                             |                              |                       |
| African American                      | 3090 (8.8)                 | 5107 (9.3)                  | 6974 (9.2)                   | 15171 (9.2)           |
| Asian                                 | 735 (2.1)                  | 1105 (2.0)                  | 1139 (1.5)                   | 2979 (1.8)            |
| Caucasian                             | 13 608 (38.8)              | 27 094 (49.5)               | 41 533 (55.0)                | 82 235 (49.7)         |
| Hispanic                              | 8353 (23.8)                | 9552 (17.4)                 | 12 061 (16.0)                | 29 966 (18.1)         |
| Other/unknown                         | 9302 (26.5)                | 11 917 (21.8)               | 13 867 (18.3)                | 35 086 (21.2)         |
| Sex, n (%)                            |                            |                             |                              |                       |
| Female                                | 16 185 (46.1)              | 26 704 (48.8)               | 39 252 (51.9)                | 82 141 (49.7)         |
| Male                                  | 18 814 (53.6)              | 27 996 (51.1)               | 36 246 (48.0)                | 83 056 (50.2)         |
| Missing                               | 89 (0.3)                   | 75 (0.1)                    | 76 (0.1)                     | 240 (0.1)             |
| Insurance category, n (%)             |                            |                             |                              |                       |
| Commercial                            | 27 501 (78.4)              | 45 476 (83.0)               | 63 570 (84.1)                | 136 547 (82.5)        |
| Other                                 | 679 (1.9)                  | 1111 (2.0)                  | 1461 (1.9)                   | 3251 (2.0)            |
| Public                                | 4511 (12.9)                | 5342 (9.8)                  | 7141 (9.4)                   | 16994 (10.3)          |
| Uninsured                             | 121 (0.3)                  | 259 (0.5)                   | 526 (0.7)                    | 906 (0.5)             |
| Missing                               | 2276 (6.5)                 | 2587 (4.7)                  | 2876 (3.8)                   | 7739 (4.7)            |
| Region, n (%)                         |                            |                             |                              |                       |
| Midwest                               | 8693 (24.8)                | 16 971 (31.0)               | 28 673 (37.9)                | 54 337 (32.8)         |
| Northeast                             | 8244 (23.5)                | 13 791 (25.2)               | 15 575 (20.6)                | 37 610 (22.7)         |
| South                                 | 9255 (26.4)                | 10 829 (19.8)               | 16 151 (21.4)                | 36 235 (21.9)         |
| West                                  | 1947 (5.5)                 | 3912 (7.1)                  | 4950 (6.5)                   | 10 809 (6.5)          |
| Other/unknown                         | 6949 (19.8)                | 9272 (16.9)                 | 10225 (13.5)                 | 26 446 (16.0)         |
| Predominant variant, n (%)            |                            |                             |                              |                       |
| Original                              | 8042 (22.9)                | 10 012 (18.3)               | 17 390 (23.0)                | 35 444 (21.4)         |
| Alpha                                 | 8585 (24.5)                | 11 485 (21.0)               | 19 922 (26.4)                | 39 992 (24.2)         |
| Delta                                 | 6705 (19.1)                | 15 510 (28.3)               | 17 083 (22.6)                | 39 298 (23.8)         |
| Omicron                               | 5067 (14.4)                | 9002 (16.4)                 | 11 826 (15.6)                | 25 895 (15.7)         |
| Unknown/no predominant variant        | 6689 (19.1)                | 8766 (16.0)                 | 9353 (12.4)                  | 24 808 (15.0)         |
| BMI                                   |                            |                             |                              |                       |
| Mean (SD)                             | 18.1 (5.56)                | 19.5 (5.48)                 | 24.7 (6.77)                  | 21.7 (6.79)           |
| Median (IQR)                          | 17.0 (10.1–54.9)           | 17.8 (10.1–54.9)            | 23.0 (10.3–54.9)             | 19.9 (10.1–54.9)      |
| Missing, n (%)                        | 9934 (28.3)                | 9326 (17.0)                 | 10 422 (13.8)                | 29 682 (17.9)         |
| PCI Score                             |                            |                             |                              |                       |
| Mean (SD)                             | 2.00 (2.60)                | 2.28 (2.81)                 | 3.08 (3.71)                  | 2.59 (3.25)           |
| Median (IQR)                          | 1.00 (0.0–27.0)            | 1.00 (0.0–29.0)             | 2.00 (0.0–31.0)              | 2.00 (0.0–31.0)       |
| Vaccination status, n (%)             |                            |                             |                              |                       |
| No known vaccination                  | 35 088 (100)               | 51 405 (93.8)               | 63 330 (83.8)                | 149 823 (90.6)        |
| At least 1 vaccine received           | 0 (0)                      | 3370 (6.2)                  | 12244 (16.2)                 | 15614 (9.4)           |
| Outcome, n (%)                        |                            |                             |                              |                       |
| All other outcomes                    | 34 166 (97.4)              | 54 299 (99.1)               | 74 740 (98.9)                | 163 205 (98.7)        |
| Hospitalization without critical care | 343 (1.0)                  | 184 (0.3)                   | 442 (0.6)                    | 969 (0.6)             |
| Hospitalization with critical care    | 576 (2.6)                  | 291 (0.7)                   | 386 (0.8)                    | 1251 (1.1)            |
| Deceased                              | 3 (0.0)                    | 8 (0.0)                     | 1 (0.0)                      | 12 (0.0)              |

Public insurance category includes Medicaid, Medicare, and Medicare Advantage. Critical care represents ICU admission or use of intensive respiratory support, defined as high-flow nasal cannula, nonintensive positive pressure ventilation, and mechanical ventilation. IQR, interquartile range.
